# Supplementary material
Source: Atypon-hosted journal article supplement (doi:10.1287/ijoc.2023.0508)
Supplement: ijoc.2023.0508.sm1.pdf [file ijoc.2023.0508.sm1.pdf]

# Online Supplement: Semantic Aggregated Adversarial Training Framework for Hate Speech Detection

---

## Appendix A Theoretical Analysis

In this section, we present a theoretical analysis of the effectiveness of semantic aggregation in imbalanced adversarial training. We first illustrate the limitations in reweighting-based adversarial training through robust risk analysis, where minority samples are assigned larger weights. Standard adversarial training seeks to minimize the worst-case loss over the set of allowable perturbations:

$$R_{\text{adv}}(\theta) = \mathbb{E}_{(x,y) \sim \mathcal{D}} \left[ \max_{\delta \in S} \ell(f_{\theta}(x + \delta), y) \right], \quad (\text{A.1})$$

where  $\delta$  belongs to the admissible perturbation set  $S$ , which represents the allowed perturbations, typically bounded by a  $p$ -norm such that  $\|\delta\|_p \leq \epsilon$ . We present a theoretical analysis using Rademacher complexity to quantify the impact of both sample weights and adversarial perturbations  $\delta$  on the generalization error. Specifically, for a function class  $\mathcal{F}$  and a dataset  $\{x_1, \dots, x_N\}$ , the empirical Rademacher complexity is defined as: (Yin et al. 2019):

$$\hat{\mathcal{R}}_N(\mathcal{F}) = \mathbb{E}_{\rho} \left[ \sup_{f \in \mathcal{F}} \frac{1}{N} \sum_{i=1}^N \rho_i f(x_i) \right], \quad (\text{A.2})$$

where  $\rho_i \in \{-1, +1\}$  are independent Rademacher variables. Rademacher complexity measures the ability of  $\mathcal{F}$  to fit random noise. For adversarial training, the function class under perturbation becomes:

$$\mathcal{F}_{\text{adv}} = \left\{ x \mapsto \max_{\delta \in S} f_{\theta}(x + \delta) : f_{\theta} \in \mathcal{F} \right\}, \quad (\text{A.3})$$

with sample-specific weights  $\omega_i$ , the empirical risk can be denoted as:

$$\hat{R}_{\text{adv}}^{\text{imbal}}(\theta) = \frac{1}{N} \sum_{i=1}^N \omega_i \max_{\delta_i \in S} \ell(f_{\theta}(x_i + \delta_i), y_i), \quad (\text{A.4})$$

the corresponding weighted Rademacher complexity becomes:

$$\hat{\mathcal{R}}_N(\mathcal{F}_{\text{adv}}^{\text{imbal}}) = \mathbb{E}_{\rho} \left[ \sup_{f_{\theta} \in \mathcal{F}} \frac{1}{N} \sum_{i=1}^N \rho_i \omega_i \max_{\delta_i \in S} f_{\theta}(x_i + \delta_i) \right]. \quad (\text{A.5})$$

Assuming  $f_{\theta}$  is  $L$ -Lipschitz and bounded by  $B$  (Pauli et al. 2021), for each  $\delta_i \in S$ , we have:

$$|f_{\theta}(x_i + \delta_i)| \leq |f_{\theta}(x_i)| + L\|\delta_i\|_p \leq |f_{\theta}(x_i)| + L\epsilon. \quad (\text{A.6})$$

applying Khintchine inequality gives an upper bound for the weighted complexity (Bartlett and Mendelson 2002):

$$\hat{\mathcal{R}}_N(\mathcal{F}_{\text{adv}}^{\text{imbal}}) \leq \frac{\sqrt{\sum_i \omega_i^2}}{N} (B + L\epsilon). \quad (\text{A.7})$$

Then, for balanced weights  $\omega_i \approx 1$ , the empirical Rademacher complexity scales as  $\hat{\mathcal{R}}_N \sim B/\sqrt{N}$ . In contrast, for imbalanced weights with  $\omega_i \gg 1$  for minority samples, it scales as  $\hat{\mathcal{R}}_N \sim \frac{\sqrt{\sum_i \omega_i^2}}{N} (B + L\epsilon) \gg B/\sqrt{N}$ . Moreover, standard Rademacher theory provides an upper bound on the gap between the expected adversarial risk and the empirical risk (Bartlett and Mendelson 2002):

$$R_{\text{adv}}(\theta) - \hat{R}_{\text{adv}}^{\text{imbal}}(\theta) \leq 2\hat{\mathcal{R}}_N(\mathcal{F}_{\text{adv}}^{\text{imbal}}) + O\left(\sqrt{\frac{\log(1/\delta)}{N}}\right). \quad (\text{A.8})$$

Therefore, the combination of large sample weights and a substantial perturbation range  $\epsilon$  can inflate the Rademacher complexity, increasing the upper bound on the robust generalization error and widening the generalization gap. As a result, imbalanced adversarial training is especially susceptible to severe overfitting. To mitigate the overfitting problem, we attempt to optimize the upper bound of robust generation risk.

To provide a theoretical interpretation of semantic aggregation, following established approaches (Dobriban et al. 2023), we consider a binary classification problem with imbalanced classes:

$$y \sim \begin{cases} 0 & \text{with probability } p_0 = K/(K+1) \\ 1 & \text{with probability } p_1 = 1/(K+1) \end{cases}, \quad x \sim \begin{cases} \mathcal{N}(\mu_0, \sigma_0^2 I) & \text{if } y = 0 \\ \mathcal{N}(\mu_1, \sigma_1^2 I) & \text{if } y = 1 \end{cases}, \quad (\text{A.9})$$

where  $\mu_y$  and  $\sigma_y$  denote the mean and standard deviation of the features for each class, with  $p_0 \gg p_1$  reflecting the class imbalance. Let  $h = g_\theta(x)$  denote the feature mapping, and  $f_\theta(h) = \text{sign}(\langle w, h \rangle + b)$  defines a linear classifier.

Let  $\Delta := \mu_1 - \mu_0$  denotes the inter-class displacement, with  $d := \|\Delta\|$  representing the inter-class distance. We decompose the classifier weight vector as  $w = \alpha u + w_\perp$ , where  $u = \Delta/d$  and  $\alpha = \langle w, u \rangle$ . The effective class margin is defined as  $\gamma = \langle w, \mu_1 - \mu_0 \rangle = \alpha d$ , which is bounded by  $\gamma \leq \|w\|d$  according to the Cauchy–Schwarz inequality. For each class  $y$ , we define the class-wise deviation as:

$$\epsilon_h := h_y - \mu_y, \quad h_y + \delta = \mu_y + \epsilon_h + \delta, \quad (\text{A.10})$$

and the projection mean as  $m_y = \langle w, \mu_y \rangle$ . Let the linear score be  $a = \langle w, h \rangle$ , its conditional second moment can be decomposed as:

$$\mathbb{E}[a^2 | y] = m_y^2 + \|w\|^2 \sigma_y^2, \quad (\text{A.11})$$

where  $\sigma_y^2$  is the intra-class variance along  $w$ . Finally, the adversarial error probability for each class  $y$  can be expressed as follows:

$$\text{AdvError}_y = \Pr(f_\theta(h_y + \delta) \neq y) = \Pr(\langle w, \epsilon_h + \delta \rangle \leq -\gamma_y), \quad (\text{A.12})$$

where  $\gamma_y := \langle w, \mu_y \rangle + b$  denotes the class-wise margin. Define  $X := \langle w, \epsilon_h \rangle$  with  $\mathbb{E}[X] = 0$  and  $\text{Var}(X) = \|w\|^2 \sigma_y^2$ . Since  $|\langle w, \delta \rangle| \leq \|w\|\epsilon$ , the error probability can be bounded using Chebyshev’s inequality (Xu and Mannor 2012):

$$\text{AdvError}_y \leq \Pr(|X| \geq \gamma_y - \|w\|\epsilon) \leq \frac{\|w\|^2 \sigma_y^2}{(\gamma_y - \|w\|\epsilon)^2}. \quad (\text{A.13})$$

Similarly, the natural–adversarial gap for the minority class is given by:

$$\text{Gap}_1 := \text{AdvError}_1 - \text{NatError}_1 \leq \|w\|^2 \sigma_1^2 \left( \frac{1}{(\gamma - \|w\|\epsilon)^2} - \frac{1}{\gamma^2} \right). \quad (\text{A.14})$$

Considering the magnitude constraint on  $\epsilon$ , we have  $\gamma_y > |w|\epsilon$ , so increasing the class margin effectively reduces the upper bound on the error.

The weighted empirical Rademacher complexity in Equation A.5 of the adversarial hypothesis class can be further bounded as:

$$\hat{\mathcal{R}}_N(\mathcal{F}_{\text{adv}}) \lesssim \frac{1}{N} \sqrt{\sum_{i=1}^N w_i^2 \mathbb{E}[a_i^2]} = \frac{1}{N} \sqrt{\sum_{i=1}^N w_i^2 (m_{y_i}^2 + \|w\|^2 \sigma_{y_i}^2)}. \quad (\text{A.15})$$

Thus, class variance is positively correlated with both the error probability upper bound and the Rademacher complexity. Optimizing this bound can effectively reduce the robust risks in imbalanced adversarial training. Building on this insight, we propose Semantic Aggregation, which mitigates overfitting by increasing inter-class separation and compressing class feature distributions, thereby reducing both adversarial errors and the generalization gap:

$$\|\mu_1 - \mu_0\| \rightarrow \|\mu_1 - \mu_0\|^{\text{SA}} > \|\mu_1 - \mu_0\| \quad \Rightarrow \quad \gamma^{\text{SA}} > \gamma, \sigma_y \rightarrow \sigma_y^{\text{SA}} < \sigma_y. \quad (\text{A.16})$$

## Appendix B Supplementary Experimental Results

This section provides additional experimental results that supplement the experiments reported in the main text. Table B.1 shows the robust performance of benchmark methods under character-level attacks. Table B.2 to Table B.5 present the robust performance of eight benchmark methods under TextBugger, TextFooler, Hotflip and BAE attack. As a side note, SAAT performs better against character-level attacks, such as TextBugger and HotFlip, than against word-level attacks like TextFooler and BAE. These character-level attacks are often more effective, leading to significant degradation in detection performance. In addition, Table B.6 illustrates the bias and explainability performance of benchmark methods on HateXplain dataset. Table B.7 reports mean and standard deviation scores across varying model initializations and dataset partitions. Table B.9 presents the robust performance of the benchmark adversarial training methods. In Table B.10, we report the performance of benchmark aggregation methods compared with SAAT and its variant without semantic aggregation. Figure B.1 shows the robust performance of benchmark methods under black-box attacks with varied sample sizes. Figure B.2 presents the regular and robust performance of SAAT under varied hyper-parameters.

Moreover, we conduct a corpus-level comparative analysis between Toxigen and three other imbalanced datasets (HSOL, CLID, and Latent Hatred) using three categories of indicators: syntactic complexity, lexical overlap, and adversarial phrasing. Syntactic complexity is measured by *td* (Tree Depth), *asl* (Average Sentence Length), and *awl* (Average Word Length), capturing sentence and word structural variation via dependency parsing (Wang and Buschmeier 2024). Lexical

**Table B.1 Robust Performance Under White-Box Attacks at Character Level**

| Methods         | Wassem        |               |               |               |               |               | OLID          |               |               |               |               |               |               |               |
|-----------------|---------------|---------------|---------------|---------------|---------------|---------------|---------------|---------------|---------------|---------------|---------------|---------------|---------------|---------------|
|                 | <i>acc*</i>   | <i>prec*</i>  | <i>rec*</i>   | <i>f1*</i>    | <i>mafl*</i>  | <i>auc*</i>   | <i>asr</i> ↓  | <i>acc*</i>   | <i>prec*</i>  | <i>rec*</i>   | <i>f1*</i>    | <i>mafl*</i>  | <i>auc*</i>   | <i>asr</i> ↓  |
| Tw-Star         | 0.4223        | 0.4394        | 0.5662        | 0.4948        | 0.4098        | 0.6127        | 0.4259        | 0.3009        | 0.0440        | 0.0699        | 0.0540        | 0.2551        | 0.4449        | 0.6228        |
| CNN_LSTM        | 0.5615        | 0.5476        | 0.7021        | 0.6153        | 0.5521        | 0.7396        | 0.2695        | 0.4887        | 0.1856        | 0.1433        | 0.1617        | 0.2745        | 0.5166        | 0.6725        |
| CNN_GRU         | 0.499         | 0.4991        | 0.5823        | 0.5375        | 0.4955        | 0.6878        | 0.3417        | 0.4831        | 0.1662        | 0.1539        | 0.1598        | 0.2128        | 0.3690        | 0.7122        |
| ToxDectRoBERTa  | 0.5203        | 0.5132        | 0.7804        | 0.6192        | 0.4852        | 0.7777        | 0.3067        | 0.5144        | 0.2019        | 0.1688        | 0.1839        | 0.3506        | 0.6255        | 0.5666        |
| BERT-HateXplain | 0.4835        | 0.4878        | 0.6016        | 0.5388        | 0.4781        | 0.6894        | 0.3264        | 0.5279        | 0.2144        | 0.2049        | 0.2095        | 0.3042        | 0.4985        | 0.6188        |
| HateBERT        | 0.5956        | 0.5841        | 0.6615        | 0.6204        | 0.5933        | 0.8185        | 0.2372        | 0.5189        | 0.2067        | 0.1994        | 0.2030        | 0.3144        | 0.6090        | 0.5838        |
| fBERT           | 0.5617        | 0.5435        | 0.7522        | 0.6303        | 0.5435        | 0.8157        | 0.268         | 0.5387        | 0.2203        | 0.2276        | 0.2239        | 0.3688        | 0.6499        | 0.5328        |
| SAAT(Ours)      | <b>0.5982</b> | <b>0.5932</b> | <b>0.8713</b> | <b>0.7058</b> | <b>0.7382</b> | <b>0.8982</b> | <b>0.2119</b> | <b>0.7466</b> | <b>0.6728</b> | <b>0.6948</b> | <b>0.6836</b> | <b>0.5899</b> | <b>0.7204</b> | <b>0.2697</b> |
| Methods         | HSOL          |               |               |               |               |               | de Gibert     |               |               |               |               |               |               |               |
|                 | <i>acc*</i>   | <i>prec*</i>  | <i>rec*</i>   | <i>f1*</i>    | <i>mafl*</i>  | <i>auc*</i>   | <i>asr</i> ↓  | <i>acc*</i>   | <i>prec*</i>  | <i>rec*</i>   | <i>f1*</i>    | <i>mafl*</i>  | <i>auc*</i>   | <i>asr</i> ↓  |
| Tw-Star         | 0.4532        | 0.1042        | 0.1218        | 0.1123        | 0.1797        | 0.4112        | 0.5546        | 0.2384        | 0.1188        | 0.3635        | 0.1791        | 0.1985        | 0.4196        | 0.506         |
| CNN_LSTM        | 0.4665        | 0.1213        | 0.1285        | 0.1248        | 0.1476        | 0.399         | 0.5415        | 0.364         | 0.1284        | 0.3833        | 0.1924        | 0.2775        | 0.5843        | 0.484         |
| CNN_GRU         | 0.4956        | 0.1816        | 0.1709        | 0.1761        | 0.1657        | 0.4056        | 0.5066        | 0.3453        | 0.1303        | 0.411         | 0.1979        | 0.2622        | 0.5177        | 0.384         |
| ToxDectRoBERTa  | 0.4881        | 0.1645        | 0.1542        | 0.1592        | 0.3268        | 0.6441        | 0.5125        | 0.6647        | 0.169         | 0.3243        | 0.2222        | 0.504         | 0.7466        | 0.392         |
| BERT-HateXplain | 0.4695        | 0.1344        | 0.1161        | 0.1246        | 0.3227        | 0.6488        | 0.5344        | 0.5124        | 0.1405        | 0.4857        | 0.2180        | 0.4316        | 0.614         | 0.578         |
| HateBERT        | 0.459         | 0.1559        | 0.1481        | 0.1519        | 0.3713        | 0.691         | 0.5122        | 0.5762        | 0.1887        | 0.4412        | 0.2643        | 0.5241        | 0.7374        | 0.414         |
| fBERT           | 0.4662        | 0.1673        | 0.1396        | 0.1522        | 0.3519        | 0.6616        | 0.5223        | 0.6823        | 0.1438        | 0.3818        | 0.2089        | 0.505         | 0.7497        | 0.376         |
| SAAT(Ours)      | <b>0.7945</b> | <b>0.7348</b> | <b>0.7155</b> | <b>0.725</b>  | <b>0.8123</b> | <b>0.8013</b> | <b>0.1458</b> | <b>0.8121</b> | <b>0.5499</b> | <b>0.4458</b> | <b>0.4924</b> | <b>0.6785</b> | <b>0.8346</b> | <b>0.15</b>   |
| Methods         | GHC           |               |               |               |               |               | HateXplain    |               |               |               |               |               |               |               |
|                 | <i>acc*</i>   | <i>prec*</i>  | <i>rec*</i>   | <i>f1*</i>    | <i>mafl*</i>  | <i>auc*</i>   | <i>asr</i> ↓  | <i>acc*</i>   | <i>prec*</i>  | <i>rec*</i>   | <i>f1*</i>    | <i>mafl*</i>  | <i>auc*</i>   | <i>asr</i> ↓  |
| Tw-Star         | 0.3459        | 0.1145        | 0.4858        | 0.1853        | 0.257         | 0.452         | 0.6176        | 0.2408        | 0.1667        | 0.1346        | 0.1489        | 0.2307        | 0.4103        | 0.6883        |
| CNN_LSTM        | 0.4581        | 0.1121        | 0.5792        | 0.1878        | 0.3184        | 0.5723        | 0.4892        | 0.3375        | 0.2445        | 0.156         | 0.1905        | 0.3145        | 0.5237        | 0.5798        |
| CNN_GRU         | 0.4757        | 0.1232        | 0.5583        | 0.2019        | 0.3268        | 0.5945        | <b>0.423</b>  | 0.3108        | 0.1935        | 0.1259        | 0.1525        | 0.2842        | 0.4984        | 0.6086        |
| ToxDectRoBERTa  | 0.5016        | 0.1167        | <b>0.566</b>  | 0.1935        | 0.4156        | 0.6877        | 0.536         | 0.4822        | 0.4583        | 0.2244        | 0.3013        | 0.3423        | 0.6333        | 0.411         |
| BERT-HateXplain | 0.491         | 0.1226        | 0.5614        | 0.2013        | 0.4139        | 0.6047        | 0.6032        | 0.295         | 0.2644        | 0.2307        | 0.2464        | 0.292         | 0.4714        | 0.6358        |
| HateBERT        | <b>0.6028</b> | 0.1699        | 0.5556        | 0.2602        | <b>0.494</b>  | <b>0.7277</b> | 0.48          | 0.3584        | 0.3214        | 0.2719        | 0.2946        | 0.3458        | 0.5377        | 0.5783        |
| fBERT           | 0.518         | 0.1006        | 0.4035        | 0.1603        | 0.4111        | 0.6106        | 0.5542        | 0.3816        | 0.3286        | 0.2354        | 0.2706        | 0.3657        | 0.6066        | 0.8503        |
| SAAT(Ours)      | 0.4515        | <b>0.1971</b> | 0.4867        | <b>0.2806</b> | 0.4673        | 0.657         | 0.595         | <b>0.695</b>  | <b>0.6338</b> | <b>0.3214</b> | <b>0.4265</b> | <b>0.3932</b> | <b>0.6726</b> | <b>0.267</b>  |
| Methods         | Latent Hatred |               |               |               |               |               | Toxigen       |               |               |               |               |               |               |               |
|                 | <i>acc*</i>   | <i>prec*</i>  | <i>rec*</i>   | <i>f1*</i>    | <i>mafl*</i>  | <i>auc*</i>   | <i>asr</i> ↓  | <i>acc*</i>   | <i>prec*</i>  | <i>rec*</i>   | <i>f1*</i>    | <i>mafl*</i>  | <i>auc*</i>   | <i>asr</i> ↓  |
| Tw-Star         | 0.4995        | 0.4902        | 0.0503        | 0.0907        | 0.3725        | 0.5933        | <b>0.0477</b> | 0.1566        | 0.1918        | 0.214         | 0.2023        | 0.1532        | 0.2726        | 0.7926        |
| CNN_LSTM        | 0.3106        | 0.3201        | 0.338         | 0.3288        | 0.3095        | 0.4759        | 0.5434        | 0.206         | 0.2024        | 0.2           | 0.2012        | 0.206         | 0.3512        | 0.7216        |
| CNN_GRU         | 0.3114        | 0.348         | 0.3655        | 0.357         | 0.5707        | 0.6735        | 0.2162        | 0.1653        | 0.1735        | 0.178         | 0.1757        | 0.1649        | 0.2811        | 0.7806        |
| ToxDectRoBERTa  | 0.2811        | 0.1309        | 0.2293        | 0.1667        | 0.2664        | 0.4421        | 0.6585        | 0.3154        | 0.3612        | 0.472         | 0.4219        | 0.2509        | 0.416         | 0.5677        |
| BERT-HateXplain | 0.3425        | 0.2163        | 0.3609        | 0.2705        | 0.3356        | 0.5452        | 0.521         | 0.2009        | 0.2656        | 0.347         | 0.3009        | 0.184         | 0.3533        | 0.7484        |
| HateBERT        | 0.3104        | 0.0977        | 0.1221        | 0.1085        | 0.2729        | 0.4602        | 0.5811        | 0.3315        | 0.3534        | 0.413         | 0.3809        | 0.2757        | 0.4608        | 0.6024        |
| fBERT           | 0.2886        | 0.1515        | 0.302         | 0.2018        | 0.2796        | 0.4831        | 0.616         | 0.1726        | 0.2014        | 0.226         | 0.2122        | 0.1679        | 0.2978        | 0.7821        |
| SAAT(Ours)      | <b>0.5503</b> | <b>0.5297</b> | <b>0.4273</b> | <b>0.473</b>  | <b>0.6355</b> | <b>0.6685</b> | 0.2144        | <b>0.3356</b> | <b>0.3893</b> | <b>0.483</b>  | <b>0.4311</b> | <b>0.2925</b> | <b>0.5042</b> | <b>0.3467</b> |

Note: \* refers to the robust performance under adversarial attacks.

**Table B.2 Performance Under TextBugger**

| Methods         | <i>acc*</i>   | <i>prec*</i>  | <i>rec*</i>   | <i>f1*</i>    | <i>mafl*</i>  | <i>auc*</i>   | <i>asr</i> ↓  | <i>acc*</i>   | <i>prec*</i>  | <i>rec*</i>   | <i>f1*</i>    | <i>mafl*</i>  | <i>auc*</i>   | <i>asr</i> ↓  |
|-----------------|---------------|---------------|---------------|---------------|---------------|---------------|---------------|---------------|---------------|---------------|---------------|---------------|---------------|---------------|
|                 | Wassem        |               |               |               |               |               |               | OLID          |               |               |               |               |               |               |
| Tw-Star         | 0.0961        | 0.019         | 0.016         | 0.0174        | 0.0902        | 0.1769        | 0.8708        | 0.1721        | 0.0089        | 0.0062        | 0.0073        | 0.1486        | 0.2739        | 0.6876        |
| CNN_LSTM        | 0.1324        | 0.0082        | 0.006         | 0.0068        | 0.1164        | 0.2075        | 0.8371        | 0.4647        | 0.152         | 0.1121        | 0.1290        | 0.2404        | 0.4816        | 0.5598        |
| CNN_GRU         | 0.1194        | 0.0128        | 0.01          | 0.0112        | 0.1084        | 0.1945        | 0.842         | 0.4413        | 0.1013        | 0.1252        | 0.1120        | 0.2244        | 0.4595        | 0.6076        |
| ToxDectRoBERTa  | 0.1306        | 0.0698        | 0.06          | 0.0645        | 0.1257        | 0.232         | 0.8385        | <b>0.5304</b> | <b>0.1625</b> | 0.1124        | 0.1329        | 0.3079        | <b>0.7412</b> | <b>0.5576</b> |
| BERT-HateXplain | 0.1257        | 0             | 0             | 0             | 0.1111        | 0.2265        | 0.8418        | 0.455         | 0.1004        | 0.1135        | 0.1065        | 0.2032        | 0.4639        | 0.6331        |
| HateBERT        | 0.3308        | 0.0526        | 0.02          | 0.029         | 0.2588        | 0.5931        | 0.5951        | 0.515         | 0.1488        | <b>0.152</b>  | <b>0.1504</b> | <b>0.3497</b> | 0.6687        | 0.5828        |
| fBERT           | 0.2322        | 0.0179        | 0.01          | 0.0128        | 0.1908        | 0.4383        | 0.7013        | 0.5035        | 0.118         | 0.1437        | 0.1296        | 0.3395        | 0.6497        | 0.5685        |
| SAAT(Ours)      | <b>0.4367</b> | <b>0.2133</b> | <b>0.169</b>  | <b>0.1886</b> | <b>0.4575</b> | <b>0.6861</b> | <b>0.5592</b> | 0.4977        | 0.1392        | 0.1173        | 0.1273        | 0.2863        | 0.5733        | 0.5855        |
| Methods         | HSOL          |               |               |               |               |               |               | de Gibert     |               |               |               |               |               |               |
|                 | <i>acc*</i>   | <i>prec*</i>  | <i>rec*</i>   | <i>f1*</i>    | <i>mafl*</i>  | <i>auc*</i>   | <i>asr</i> ↓  | <i>acc*</i>   | <i>prec*</i>  | <i>rec*</i>   | <i>f1*</i>    | <i>mafl*</i>  | <i>auc*</i>   | <i>asr</i> ↓  |
| Tw-Star         | 0.5763        | 0.1065        | 0.1225        | 0.1139        | 0.3656        | 0.692         | 0.5305        | 0.1216        | 0.1411        | 0.2976        | 0.1139        | 0.1071        | 0.1985        | 0.63          |
| CNN_LSTM        | 0.4173        | 0.1033        | 0.1442        | 0.1204        | 0.2944        | 0.5368        | 0.5478        | 0.3493        | 0.1457        | 0.3044        | 0.1204        | 0.2587        | 0.5384        | 0.646         |
| CNN_GRU         | 0.4326        | 0.1128        | 0.1478        | 0.1279        | 0.302         | 0.555         | 0.5198        | 0.3356        | 0.1477        | 0.3061        | 0.1279        | 0.2509        | 0.5009        | 0.5699        |
| ToxDectRoBERTa  | 0.4425        | 0.1788        | 0.2556        | 0.2104        | 0.3056        | 0.7601        | 0.5125        | 0.6246        | 0.1844        | 0.3268        | 0.2104        | 0.3842        | 0.646         | 0.5973        |
| BERT-HateXplain | 0.4518        | 0.1847        | 0.2675        | 0.2185        | 0.3155        | 0.7547        | 0.5071        | 0.3881        | 0.191         | 0.3455        | 0.2185        | 0.2795        | 0.4173        | 0.5708        |
| HateBERT        | 0.475         | 0.1845        | 0.2566        | 0.2147        | 0.322         | 0.7811        | 0.5066        | 0.6204        | 0.1913        | 0.3552        | 0.2147        | 0.3827        | 0.6559        | 0.5442        |
| fBERT           | 0.5981        | 0.1932        | 0.279         | 0.2283        | <b>0.3742</b> | <b>0.7815</b> | 0.4896        | 0.5962        | 0.2065        | 0.404         | 0.2283        | 0.378         | 0.6381        | 0.5392        |
| SAAT(Ours)      | <b>0.605</b>  | <b>0.3705</b> | <b>0.3458</b> | <b>0.3578</b> | 0.3681        | 0.6395        | <b>0.3324</b> | <b>0.7399</b> | <b>0.4871</b> | <b>0.3949</b> | <b>0.4093</b> | <b>0.6182</b> | <b>0.7994</b> | <b>0.2145</b> |
| Methods         | GHC           |               |               |               |               |               |               | HateXplain    |               |               |               |               |               |               |
|                 | <i>acc*</i>   | <i>prec*</i>  | <i>rec*</i>   | <i>f1*</i>    | <i>mafl*</i>  | <i>auc*</i>   | <i>asr</i> ↓  | <i>acc*</i>   | <i>prec*</i>  | <i>rec*</i>   | <i>f1*</i>    | <i>mafl*</i>  | <i>auc*</i>   | <i>asr</i> ↓  |
| Tw-Star         | 0.2635        | 0.106         | 0.3844        | 0.1662        | 0.2086        | 0.3392        | 0.6536        | 0.0726        | 0.0246        | 0.0045        | 0.0043        | 0.0677        | 0.1356        | 0.9085        |
| CNN_LSTM        | 0.4595        | 0.1145        | 0.4755        | 0.1846        | 0.3148        | 0.5678        | 0.5692        | 0.216         | 0.1069        | 0.1024        | 0.1046        | 0.1791        | 0.3299        | 0.7276        |
| CNN_GRU         | 0.473         | 0.116         | 0.4866        | 0.1873        | 0.3211        | 0.5896        | 0.553         | 0.1675        | 0.1122        | 0.1221        | 0.1169        | 0.1831        | 0.2643        | 0.7913        |
| ToxDectRoBERTa  | <b>0.6304</b> | <b>0.5562</b> | <b>0.5014</b> | <b>0.5274</b> | <b>0.4278</b> | <b>0.6274</b> | <b>0.5326</b> | 0.3104        | 0.2476        | 0.2422        | 0.2449        | 0.2766        | 0.5398        | 0.5894        |
| BERT-HateXplain | 0.294         | 0.1523        | 0.4888        | 0.2322        | 0.2272        | 0.3169        | 0.5741        | 0.1124        | 0.1125        | 0.1123        | 0.1411        | 0.181         | 0.197         | 0.8706        |
| HateBERT        | 0.4766        | 0.1342        | 0.5011        | 0.2117        | 0.3225        | 0.5053        | 0.5837        | 0.1657        | 0.1278        | 0.1162        | 0.1124        | 0.1932        | 0.2745        | 0.8129        |
| fBERT           | 0.3868        | 0.139         | 0.4204        | 0.2089        | 0.2815        | 0.425         | 0.5777        | 0.1252        | 0.1113        | 0.1031        | 0.1078        | 0.1233        | 0.2297        | 0.8503        |
| SAAT(Ours)      | 0.5742        | 0.3552        | 0.2688        | 0.3059        | 0.3533        | 0.526         | 0.5718        | <b>0.5705</b> | <b>0.3548</b> | <b>0.3741</b> | <b>0.3642</b> | <b>0.4595</b> | <b>0.7152</b> | <b>0.56</b>   |
|                 |               |               |               |               |               |               |               |               |               |               |               |               |               |               |

**Table B.3 Performance Under TextFooler**

| Methods              | Wassem        |               |               |               |               |               | OLID          |               |               |               |               |               |               |               |
|----------------------|---------------|---------------|---------------|---------------|---------------|---------------|---------------|---------------|---------------|---------------|---------------|---------------|---------------|---------------|
|                      | <i>acc</i> *  | <i>prec</i> * | <i>rec</i> *  | <i>f1</i> *   | <i>maf1</i> * | <i>auc</i> *  | <i>asr</i> ↓  | <i>acc</i> *  | <i>prec</i> * | <i>rec</i> *  | <i>f1</i> *   | <i>maf1</i> * | <i>auc</i> *  | <i>asr</i> ↓  |
| Tw-Star              | 0.4582        | 0.5514        | 0.6224        | 0.5848        | 0.5562        | 0.6864        | 0.485         | 0.4817        | 0.4676        | 0.4046        | 0.4338        | 0.4779        | 0.569         | 0.7098        |
| CNN_LSTM             | 0.4267        | 0.6013        | 0.7485        | 0.6669        | 0.6203        | 0.773         | 0.3012        | <b>0.5743</b> | 0.5804        | 0.4793        | 0.5250        | 0.5697        | 0.6524        | 0.4949        |
| CNN_GRU              | 0.4374        | <b>0.6179</b> | 0.7183        | 0.6643        | <b>0.6346</b> | 0.758         | 0.3844        | 0.5316        | <b>0.5232</b> | <b>0.5145</b> | <b>0.5188</b> | <b>0.5312</b> | 0.6016        | 0.6293        |
| ToxDectRoBERTa       | 0.5323        | 0.5209        | 0.796         | 0.6297        | 0.4969        | 0.7943        | 0.3317        | 0.3806        | 0.1809        | 0.2168        | 0.1972        | 0.3131        | 0.6307        | 0.4428        |
| BERT-HateXplain      | 0.4561        | 0.4694        | 0.6763        | 0.5542        | 0.4283        | 0.7026        | 0.4062        | 0.2188        | 0.0621        | 0.1204        | 0.0819        | 0.1924        | 0.3876        | 0.6822        |
| HateBERT             | 0.4364        | 0.4206        | 0.3362        | 0.3737        | 0.4303        | 0.5993        | 0.4352        | 0.3746        | 0.1942        | 0.1408        | 0.1632        | 0.3148        | 0.6377        | <b>0.4777</b> |
| fBERT                | <b>0.6406</b> | 0.5943        | <b>0.7569</b> | 0.6658        | 0.6128        | <b>0.8484</b> | <b>0.2365</b> | 0.4203        | 0.3039        | 0.124         | 0.1761        | 0.3643        | <b>0.6806</b> | <b>0.4247</b> |
| SAAT(Ours)           | 0.634         | 0.6106        | 0.7402        | <b>0.6692</b> | 0.6298        | 0.8398        | 0.2454        | 0.3425        | 0.2074        | 0.1125        | 0.1459        | 0.3052        | 0.4973        | 0.5169        |
| <b>HSOL</b>          |               |               |               |               |               |               |               |               |               |               |               |               |               |               |
| Tw-Star              | 0.5659        | 0.3065        | 0.3364        | 0.3208        | 0.4034        | 0.7258        | 0.4331        | 0.2506        | 0.1408        | 0.372         | 0.2043        | 0.2466        | 0.5763        | 0.606         |
| CNN_LSTM             | 0.5507        | 0.3561        | 0.3636        | 0.3598        | 0.4577        | 0.6931        | 0.446         | 0.2786        | 0.1108        | 0.43          | 0.1762        | 0.2285        | 0.6824        | 0.6484        |
| CNN_GRU              | 0.5811        | 0.3376        | 0.3583        | 0.3476        | 0.4645        | 0.7465        | 0.4231        | 0.2654        | 0.1895        | 0.428         | 0.2627        | 0.2867        | 0.6548        | 0.6516        |
| ToxDectRoBERTa       | 0.6452        | 0.5375        | 0.5524        | 0.5448        | 0.5376        | 0.8152        | 0.2577        | 0.6211        | 0.3382        | 0.4136        | 0.3721        | 0.5286        | 0.6809        | 0.3654        |
| BERT-HateXplain      | 0.6335        | <b>0.5516</b> | 0.5262        | 0.5386        | 0.5358        | 0.7627        | 0.3041        | 0.6128        | 0.3405        | 0.4857        | 0.4003        | 0.5616        | 0.6614        | 0.378         |
| HateBERT             | <b>0.6624</b> | 0.5172        | 0.5644        | <b>0.5398</b> | <b>0.5988</b> | <b>0.8321</b> | <b>0.2457</b> | 0.6665        | 0.3887        | <b>0.4412</b> | 0.4133        | 0.5841        | 0.7374        | 0.3414        |
| fBERT                | 0.6094        | 0.5025        | <b>0.5742</b> | 0.4885        | 0.4927        | 0.817         | 0.2738        | 0.6382        | 0.3438        | 0.3818        | 0.3618        | 0.5205        | 0.7497        | 0.3765        |
| SAAT(Ours)           | 0.6214        | 0.5172        | 0.5255        | 0.5213        | 0.5853        | 0.8217        | 0.2771        | <b>0.6979</b> | <b>0.4194</b> | 0.4322        | <b>0.4257</b> | <b>0.6041</b> | <b>0.7552</b> | <b>0.3237</b> |
| <b>de Gibert</b>     |               |               |               |               |               |               |               |               |               |               |               |               |               |               |
| Tw-Star              | 0.3527        | 0.1617        | 0.4958        | 0.2439        | 0.5275        | 0.6428        | 0.6776        | 0.2818        | 0.2872        | 0.1634        | 0.2083        | 0.2988        | 0.5004        | 0.724         |
| CNN_LSTM             | 0.4793        | 0.2741        | 0.384         | 0.3199        | 0.4743        | 0.6028        | 0.603         | 0.2678        | 0.2542        | 0.1792        | 0.2102        | 0.2711        | 0.4635        | 0.6892        |
| CNN_GRU              | 0.4811        | 0.2676        | 0.4583        | 0.3379        | 0.5245        | 0.6555        | 0.5823        | 0.2723        | 0.2645        | 0.1766        | 0.2118        | 0.2666        | 0.4946        | 0.7064        |
| ToxDectRoBERTa       | 0.4625        | 0.3133        | 0.2752        | 0.2930        | 0.3576        | 0.5749        | 0.5515        | 0.3982        | 0.3642        | 0.2241        | 0.2775        | 0.3943        | <b>0.6447</b> | 0.5077        |
| BERT-HateXplain      | 0.4373        | 0.2654        | 0.2395        | 0.2518        | 0.3139        | 0.5403        | 0.6294        | 0.3066        | 0.2461        | 0.188         | 0.2132        | 0.2962        | 0.497         | 0.6331        |
| HateBERT             | 0.4975        | <b>0.3225</b> | 0.2508        | 0.2822        | 0.3494        | 0.5522        | 0.5478        | 0.3923        | 0.369         | 0.248         | 0.2966        | 0.3957        | 0.6355        | 0.5187        |
| fBERT                | 0.4684        | 0.298         | 0.2565        | 0.2757        | 0.3211        | 0.4956        | 0.6533        | 0.3824        | 0.3314        | 0.232         | 0.2729        | 0.3678        | 0.6031        | 0.5474        |
| SAAT(Ours)           | <b>0.6415</b> | 0.2667        | <b>0.4842</b> | <b>0.344</b>  | <b>0.5244</b> | <b>0.7284</b> | <b>0.4857</b> | <b>0.4105</b> | <b>0.3856</b> | <b>0.3522</b> | <b>0.3716</b> | <b>0.4032</b> | 0.6069        | <b>0.4906</b> |
| <b>GHC</b>           |               |               |               |               |               |               |               |               |               |               |               |               |               |               |
| Tw-Star              | 0.5147        | 0.4595        | 0.3714        | 0.4108        | 0.5101        | 0.6189        | 0.601         | 0.1726        | 0.1764        | 0.239         | 0.203         | 0.1718        | <b>0.4505</b> | 0.8335        |
| CNN_LSTM             | 0.5173        | 0.4716        | 0.3458        | 0.3990        | 0.5071        | 0.6028        | 0.6237        | 0.2154        | 0.2231        | 0.268         | 0.2435        | 0.2134        | 0.5145        | 0.781         |
| CNN_GRU              | 0.2808        | 0.1309        | 0.2293        | 0.1667        | 0.2664        | 0.4421        | 0.6585        | 0.1809        | 0.1681        | 0.254         | 0.2023        | 0.2138        | 0.459         | 0.8092        |
| ToxDectRoBERTa       | 0.5464        | 0.4637        | 0.4811        | 0.4722        | 0.5443        | <b>0.7056</b> | 0.4484        | 0.3188        | 0.3512        | 0.484         | 0.407         | 0.2661        | 0.4387        | 0.5149        |
| BERT-HateXplain      | 0.5142        | 0.3682        | 0.4378        | 0.4000        | 0.4958        | 0.6099        | 0.674         | 0.2515        | 0.2549        | 0.261         | 0.2574        | 0.2499        | 0.418         | 0.6843        |
| HateBERT             | 0.4646        | 0.288         | 0.4444        | 0.3495        | 0.4469        | 0.5867        | 0.642         | 0.2048        | 0.2279        | 0.248         | 0.2375        | 0.2025        | 0.3513        | 0.7418        |
| fBERT                | 0.5503        | <b>0.4814</b> | <b>0.5211</b> | <b>0.5005</b> | <b>0.5532</b> | 0.6713        | 0.4064        | <b>0.3154</b> | <b>0.3698</b> | <b>0.516</b>  | <b>0.4308</b> | <b>0.2908</b> | 0.4502        | <b>0.4769</b> |
| SAAT(Ours)           |               |               |               |               |               |               |               |               |               |               |               |               |               |               |
| <b>Latent Hatred</b> |               |               |               |               |               |               |               |               |               |               |               |               |               |               |
| Tw-Star              | 0.4975        | 0.2868        | 0.2552        | 0.2701        | 0.3322        | 0.7233        | 0.5701        | 0.425         | 0.2414        | 0.327         | 0.2778        | 0.3421        | 0.6863        | 0.4138        |
| CNN_LSTM             | 0.46          | 0.2143        | 0.2203        | 0.2173        | 0.3375        | 0.7023        | 0.5134        | 0.455         | 0.1786        | 0.2125        | 0.1941        | 0.3314        | 0.7291        | 0.2973        |
| CNN_GRU              | 0.465         | 0.2667        | 0.3304        | 0.2952        | 0.3471        | 0.7436        | 0.3955        | 0.43          | 0.1625        | 0.2241        | 0.1884        | 0.3079        | 0.6711        | 0.3255        |
| ToxDectRoBERTa       | 0.4825        | 0.3333        | 0.3035        | 0.3177        | 0.3529        | 0.8146        | 0.3689        | 0.4825        | 0.4557        | 0.4218        | 0.4381        | 0.4304        | 0.7702        | 0.3814        |
| BERT-HateXplain      | 0.4875        | 0.3333        | 0.3025        | 0.3172        | 0.348         | 0.8315        | 0.3442        | 0.4175        | 0.3187        | 0.4145        | 0.3603        | 0.3708        | 0.6605        | 0.3993        |
| HateBERT             | 0.4925        | <b>0.4407</b> | 0.3455        | 0.3871        | 0.3724        | 0.822         | 0.2677        | 0.4975        | 0.4909        | 0.4535        | 0.4715        | 0.4215        | 0.7921        | 0.3185        |
| fBERT                | <b>0.6543</b> | 0.4283        | <b>0.4655</b> | <b>0.4461</b> | <b>0.446</b>  | <b>0.8412</b> | <b>0.1747</b> | 0.4575        | 0.3333        | 0.3385        | 0.3359        | 0.3701        | 0.7703        | 0.3624        |
| SAAT(Ours)           | 0.4709        | 0.3235        | 0.355         | 0.3385        | 0.3597        | 0.7905        | 0.3037        | <b>0.645</b>  | <b>0.6157</b> | <b>0.4816</b> | <b>0.5405</b> | <b>0.4658</b> | <b>0.8508</b> | <b>0.2791</b> |
| <b>de Gibert</b>     |               |               |               |               |               |               |               |               |               |               |               |               |               |               |
| Tw-Star              | 0.415         | 0.1852        | 0.1053        | 0.1340        | 0.3251        | 0.6844        | 0.3364        | 0.4737        | 0.4612        | 0.3457        | 0.3934        | 0.4616        | 0.6878        | 0.3935        |
| CNN_LSTM             | 0.4512        | 0.1154        | 0.115         | 0.1152        | 0.3216        | 0.7217        | 0.3469        | 0.4925        | 0.4839        | 0.2252        | 0.3074        | 0.4534        | 0.6844        | 0.4102        |
| CNN_GRU              | 0.4725        | 0.1333        | 0.1114        | 0.1214        | 0.329         | 0.4792        | 0.4196        | 0.4925        | 0.4818        | 0.2246        | 0.3064        | 0.4534        | 0.7009        | 0.392         |
| ToxDectRoBERTa       | 0.646         | 0.4429        | 0.318         | 0.3702        | 0.4476        | 0.7008        | 0.1957        | 0.5125        | 0.5309        | 0.2153        | 0.3064        | 0.4652        | 0.7255        | 0.3594        |
| BERT-HateXplain      | 0.4375        | 0.3932        | 0.253         | 0.3079        | 0.4122        | 0.6837        | 0.3048        | 0.5148        | 0.5203        | 0.3846        | 0.4423        | 0.5067        | 0.7009        | 0.4046        |
| HateBERT             | 0.5013        | 0.4986        | 0.175         | 0.2591        | 0.441         | 0.8169        | 0.3117        | 0.5254        | 0.5424        | 0.3202        | 0.4027        | 0.5042        | 0.7294        | 0.3824        |
| fBERT                | 0.6022        | 0.305         | 0.1799        | 0.2263        | 0.4793        | 0.8074        | 0.3333        | 0.5278        | 0.5443        | 0.3445        | 0.4219        | 0.5115        | <b>0.7536</b> | 0.3677        |
| SAAT(Ours)           | <b>0.7375</b> | <b>0.5364</b> | <b>0.3975</b> | <b>0.4566</b> | <b>0.5675</b> | <b>0.8487</b> | <b>0.1582</b> | <b>0.5496</b> | <b>0.5494</b> | <b>0.3956</b> | <b>0.46</b>   | <b>0.5274</b> | 0.7443        | <b>0.3316</b> |
| <b>GHC</b>           |               |               |               |               |               |               |               |               |               |               |               |               |               |               |
| Tw-Star              | 0.4925        | 0.3816        | 0.049         | 0.0868        | 0.387         | 0.5977        | <b>0.0238</b> | 0.3945        | 0.4071        | 0.463         | 0.4332        | 0.3924        | 0.6007        | 0.482         |
| CNN_LSTM             | 0.4975        | 0.4968        | 0.3852        | 0.4339        | 0.4911        | 0.6495        | 0.2867        | 0.3675        | 0.3707        | 0.378         | 0.3743        | 0.3674        | 0.564         | 0.4966        |
| CNN_GRU              | 0.535         | 0.5522        | 0.3708        | 0.4431        | 0.522         | 0.6327        | 0.2336        | 0.3556        | 0.3478        | 0.32          | 0.3333        | 0.359         | 0.5336        | 0.493         |
| ToxDectRoBERTa       | 0.4596        | 0.4633        | 0.505         | 0.4832        | 0.4589        | 0.6787        | 0.4758        | 0.3652        | 0.4182        | <b>0.694</b>  | 0.5219        | 0.29          | 0.5406        | 0.5244        |
| BERT-HateXplain      | 0.3052        | 0.2044        | 0.1307        | 0.1595        | 0.283         | 0.4571        | 0.4602        | 0.3579        | 0.3986        | 0.549         | 0.4619        | 0.336         | 0.581         | 0.5152        |
| HateBERT             | 0.5911        | 0.5978        | 0.554         | 0.5729        | 0.5893        | 0.8026        | 0.3444        | 0.4775        | 0.4829        | 0.536         | 0.5081        | 0.4755        | <b>0.6981</b> | 0.4494        |
| fBERT                | 0.4325        | 0.3373        | 0.1427        | 0.1979        | 0.3794        | 0.6194        | 0.4462        | 0.361         | 0.3828        | 0.454         | 0.4154        | 0.3554        | 0.5728        | 0.5453        |
| SAAT(Ours)           | <b>0.6492</b> | <b>0.6121</b> | <b>0.5267</b> | <b>0.5664</b> | <b>0.6641</b> | <b>0.8196</b> | 0.2218        | <b>0.5775</b> | <b>0.5132</b> | 0.595         | <b>0.5511</b> | <b>0.5432</b> | 0.6422        | <b>0.4146</b> |
| <b>Latent Hatred</b> |               |               |               |               |               |               |               |               |               |               |               |               |               |               |
| Tw-Star              | 0.4925        | 0.3816        | 0.049         | 0.0868        | 0.387         | 0.5977        | <b>0.0238</b> | 0.3945        | 0.4071        | 0.463         | 0.4332        | 0.3924        | 0.6007        | 0.482         |
| CNN_LSTM             | 0.4975        | 0.4968        | 0.3852        | 0.4339        | 0.4911        | 0.6495        | 0.2867        | 0.3675        | 0.3707        | 0.378         | 0.3743        | 0.3674        | 0.564         | 0.4966        |
| CNN_GRU              | 0.535         | 0.5522        | 0.3708        | 0.4431        | 0.522         | 0.6327        | 0.2336        | 0.3556        | 0.3478        | 0.32          | 0.3333        | 0.359         | 0.5336        | 0.493         |
| ToxDectRoBERTa       | 0.4596        | 0.4633        | 0.505         | 0.4832        | 0.4589        | 0.6787        | 0.4758        | 0.3652        | 0.4182        | <b>0.694</b>  | 0.5219        | 0.29          | 0.5406        | 0.5244        |
| BERT-HateXplain      | 0.3052        | 0.2044        | 0.1307        | 0.1595        | 0.283         | 0.4571        | 0.4602        | 0.3579        | 0.3986        | 0.549         | 0.4619        | 0.336         | 0.581         | 0.5152        |
| HateBERT             | 0.5911        | 0.5978        | 0.554         | 0.5729        | 0.5893        | 0.8026        | 0.3444        | 0.4775        | 0.4829        | 0.536         | 0.5081        | 0.4755        | <b>0.6981</b> | 0.4494        |
| fBERT                | 0.4325        | 0.3373        | 0.1427        | 0.1979        | 0.3794        | 0.6194        | 0.4462        | 0.361         | 0.3828        | 0.454         | 0.4154        | 0.3554        | 0.57          |               |

Table B.5 Performance Under BAE

| Methods         | Wassem        |               |               |               |               |               | OLID          |               |               |               |               |               |               |               |
|-----------------|---------------|---------------|---------------|---------------|---------------|---------------|---------------|---------------|---------------|---------------|---------------|---------------|---------------|---------------|
|                 | <i>acc</i> *  | <i>prec</i> * | <i>rec</i> *  | <i>f1</i> *   | <i>maf1</i> * | <i>auc</i> *  | <i>asr</i> ↓  | <i>acc</i> *  | <i>prec</i> * | <i>rec</i> *  | <i>f1</i> *   | <i>maf1</i> * | <i>auc</i> *  | <i>asr</i> ↓  |
| Tw-Star         | 0.6975        | 0.6612        | 0.8071        | 0.7269        | 0.6936        | 0.8021        | 0.0478        | 0.585         | 0.6133        | 0.5446        | 0.5769        | 0.5784        | 0.6288        | 0.093         |
| CNN_LSTM        | 0.6825        | 0.6652        | 0.735         | 0.6983        | 0.6816        | 0.7763        | 0.09          | 0.6557        | 0.6333        | 0.6175        | 0.6253        | 0.6605        | 0.6852        | 0.0964        |
| CNN_GRU         | 0.7317        | 0.7072        | 0.7585        | 0.732         | 0.7292        | 0.7712        | 0.0458        | 0.6967        | 0.6765        | 0.5923        | 0.6316        | 0.6862        | 0.6764        | 0.1146        |
| ToxDectRoBERTa  | 0.7752        | 0.7218        | 0.875         | 0.7911        | 0.7717        | 0.8803        | 0.0373        | <b>0.7275</b> | 0.7495        | 0.6365        | 0.6884        | 0.7255        | <b>0.8206</b> | <b>0.054</b>  |
| BERT-HateXplain | 0.6899        | 0.6532        | 0.7881        | 0.7143        | 0.6855        | 0.8163        | 0.0676        | 0.7272        | 0.7164        | 0.6424        | 0.6774        | <b>0.7194</b> | 0.7948        | 0.126         |
| HateBERT        | 0.7821        | <b>0.7642</b> | 0.8114        | 0.7871        | <b>0.7798</b> | 0.8831        | <b>0.0341</b> | 0.765         | <b>0.7359</b> | 0.6355        | 0.6820        | 0.7166        | 0.8054        | 0.0813        |
| fBERT           | 0.7401        | 0.7081        | 0.8233        | 0.7609        | 0.7394        | 0.8739        | 0.0402        | 0.7003        | <b>0.7496</b> | 0.6574        | 0.7005        | 0.7168        | 0.8116        | 0.055         |
| SAAT(Ours)      | <b>0.7552</b> | 0.7236        | <b>0.8889</b> | <b>0.7978</b> | 0.772         | 0.8652        | 0.052         | 0.6864        | 0.7293        | <b>0.6841</b> | <b>0.7060</b> | 0.7099        | 0.7951        | 0.0922        |
| Methods         | HSOL          |               |               |               |               |               | de Gibert     |               |               |               |               |               |               |               |
| Tw-Star         | 0.8825        | 0.5778        | 0.3106        | 0.4040        | 0.3926        | 0.7204        | 0.1188        | 0.6118        | 0.3292        | 0.3511        | 0.3393        | 0.4817        | 0.758         | 0.0929        |
| CNN_LSTM        | 0.8327        | 0.4841        | 0.305         | 0.3742        | 0.3883        | 0.7697        | 0.1417        | 0.575         | 0.4261        | 0.1929        | 0.2656        | 0.3601        | 0.7833        | 0.1221        |
| CNN_GRU         | <b>0.8846</b> | 0.4971        | 0.3202        | 0.3895        | 0.3904        | 0.7531        | 0.1451        | 0.5504        | 0.4852        | 0.1845        | 0.2679        | 0.3808        | 0.701         | 0.0984        |
| ToxDectRoBERTa  | 0.8425        | 0.6385        | 0.4205        | 0.5071        | 0.5965        | 0.8211        | 0.0881        | <b>0.705</b>  | <b>0.5106</b> | 0.3247        | 0.397         | 0.4967        | 0.7818        | <b>0.0775</b> |
| BERT-HateXplain | 0.8221        | 0.5988        | 0.4265        | 0.4878        | 0.5672        | 0.8075        | 0.0686        | 0.6153        | 0.4875        | 0.315         | 0.3827        | 0.4769        | 0.7215        | 0.1119        |
| HateBERT        | 0.866         | 0.6706        | 0.4833        | 0.5617        | 0.6184        | <b>0.8439</b> | <b>0.0549</b> | 0.6825        | 0.4988        | 0.3346        | 0.4005        | 0.5366        | 0.7484        | 0.0814        |
| fBERT           | 0.8819        | <b>0.7571</b> | 0.5268        | <b>0.6213</b> | <b>0.6866</b> | 0.8239        | 0.0155        | 0.675         | 0.4823        | <b>0.3541</b> | <b>0.4084</b> | <b>0.5505</b> | <b>0.7868</b> | 0.0825        |
| SAAT(Ours)      | 0.8275        | 0.7322        | <b>0.5275</b> | 0.6132        | 0.6746        | 0.8183        | 0.0599        | 0.655         | 0.4974        | 0.3245        | 0.3928        | 0.5296        | 0.7542        | 0.0952        |
| Methods         | GHC           |               |               |               |               |               | HateXplain    |               |               |               |               |               |               |               |
| Tw-Star         | 0.6825        | 0.3672        | 0.2708        | 0.3117        | 0.3373        | 0.7374        | 0.1306        | 0.6575        | 0.5872        | 0.6384        | 0.6117        | 0.6868        | 0.8242        | 0.1271        |
| CNN_LSTM        | 0.7515        | 0.5071        | 0.1785        | 0.2641        | 0.2805        | 0.7235        | 0.1234        | 0.7772        | 0.6388        | 0.565         | 0.5996        | 0.7131        | 0.8344        | 0.1122        |
| CNN_GRU         | 0.7535        | 0.5182        | 0.1409        | 0.2216        | 0.3202        | 0.7593        | 0.1083        | 0.695         | 0.6145        | 0.5045        | 0.5541        | 0.6836        | 0.8543        | 0.1366        |
| ToxDectRoBERTa  | <b>0.7925</b> | 0.5271        | 0.5113        | <b>0.5191</b> | <b>0.6002</b> | 0.7919        | 0.1038        | 0.7725        | 0.6237        | 0.6111        | 0.6173        | 0.7463        | 0.8715        | 0.1283        |
| BERT-HateXplain | 0.7665        | 0.5287        | 0.395         | 0.4522        | 0.5387        | 0.7748        | <b>0.089</b>  | 0.7339        | 0.6533        | 0.5575        | 0.6016        | 0.7224        | 0.8684        | 0.1437        |
| HateBERT        | 0.7875        | <b>0.5388</b> | 0.4354        | 0.4816        | 0.4962        | <b>0.8061</b> | 0.0954        | <b>0.7753</b> | 0.6654        | 0.6449        | 0.655         | <b>0.7732</b> | <b>0.8915</b> | 0.1146        |
| fBERT           | 0.7645        | 0.5242        | 0.3933        | 0.4494        | 0.4817        | 0.804         | 0.0583        | 0.755         | 0.6364        | 0.634         | 0.6352        | 0.7514        | 0.8685        | 0.1293        |
| SAAT(Ours)      | 0.7325        | 0.4908        | <b>0.5366</b> | 0.5096        | 0.5127        | 0.7864        | 0.1228        | 0.7525        | <b>0.6988</b> | <b>0.6756</b> | <b>0.687</b>  | 0.7651        | 0.8818        | <b>0.0988</b> |
| Methods         | Latent Hatred |               |               |               |               |               | Toxigen       |               |               |               |               |               |               |               |
| Tw-Star         | 0.5151        | 0.3931        | 0.04          | 0.0726        | 0.3737        | 0.5687        | <b>0.0048</b> | 0.6875        | 0.6712        | 0.735         | 0.7017        | 0.6868        | 0.7006        | 0.0646        |
| CNN_LSTM        | 0.5925        | 0.4242        | 0.365         | 0.3924        | 0.5458        | 0.6326        | 0.1722        | 0.6225        | 0.6522        | 0.525         | 0.5817        | 0.6189        | 0.6803        | 0.1263        |
| CNN_GRU         | 0.5725        | 0.4593        | 0.3445        | 0.3937        | 0.5382        | 0.6268        | 0.1349        | 0.6575        | 0.6632        | 0.636         | 0.6493        | 0.6574        | 0.6923        | 0.0962        |
| ToxDectRoBERTa  | 0.7175        | 0.5884        | 0.6115        | 0.5997        | 0.6459        | 0.6403        | 0.1287        | 0.5975        | 0.5759        | 0.742         | 0.6484        | 0.5892        | 0.6701        | 0.1315        |
| BERT-HateXplain | 0.6835        | 0.5515        | <b>0.6375</b> | 0.5914        | 0.6228        | 0.6233        | 0.1046        | 0.6275        | 0.6197        | 0.658         | 0.6383        | 0.6271        | 0.7123        | 0.1661        |
| HateBERT        | 0.7255        | 0.6014        | 0.5925        | 0.5969        | <b>0.6543</b> | <b>0.6796</b> | 0.1105        | <b>0.75</b>   | <b>0.7224</b> | 0.713         | <b>0.7177</b> | <b>0.7244</b> | <b>0.7464</b> | 0.0798        |
| fBERT           | 0.7125        | 0.6061        | 0.5773        | 0.5913        | 0.5622        | 0.6564        | 0.1275        | 0.7025        | 0.6866        | <b>0.745</b>  | 0.7146        | 0.7202        | 0.7252        | <b>0.0633</b> |
| SAAT(Ours)      | <b>0.735</b>  | <b>0.6118</b> | 0.6308        | <b>0.6212</b> | 0.6444        | 0.6732        | 0.0985        | 0.703         | 0.6747        | 0.701         | 0.6876        | 0.7077        | 0.7151        | 0.0917        |

Table B.6 Bias and Explainability Performance Evaluation on HateXplain

| Methods         | Regular       |               |               |               |               |              | Bias           |                 |                 | Explainability |              |               |
|-----------------|---------------|---------------|---------------|---------------|---------------|--------------|----------------|-----------------|-----------------|----------------|--------------|---------------|
|                 | <i>acc</i>    | <i>prec</i>   | <i>rec</i>    | <i>f1</i>     | <i>maf1</i>   | <i>auc</i>   | <i>gmb-sub</i> | <i>gmb-bspn</i> | <i>gmb-bpsp</i> | <i>iou-f1</i>  | <i>auprc</i> | <i>compre</i> |
| Tw-Star         | 0.7904        | 0.6403        | 0.7326        | 0.6834        | 0.7633        | 0.8433       | 0.6842         | 0.6622          | 0.7142          | -              | -            | -             |
| CNN_LSTM        | 0.8443        | 0.789         | 0.6768        | 0.7286        | 0.8097        | 0.878        | 0.7645         | 0.7063          | 0.738           | -              | -            | -             |
| CNN_GRU         | 0.8378        | 0.7844        | 0.6547        | 0.7137        | 0.8003        | 0.8774       | 0.7623         | 0.6997          | 0.7336          | -              | -            | -             |
| ToxDectRoBERTa  | 0.8521        | <b>0.8145</b> | 0.6747        | 0.7381        | 0.8175        | 0.9093       | <b>0.7822</b>  | 0.7132          | <b>0.7495</b>   | 0.126          | 0.598        | 0.683         |
| BERT-HateXplain | 0.8596        | 0.7803        | 0.7589        | 0.7695        | 0.8343        | 0.913        | 0.7781         | 0.7066          | 0.7396          | 0.13           | 0.603        | 0.688         |
| HateBERT        | 0.8658        | 0.7954        | 0.7611        | 0.7778        | 0.8408        | 0.917        | 0.7641         | <b>0.7144</b>   | 0.742           | 0.116          | 0.606        | 0.687         |
| fBERT           | 0.8671        | 0.8113        | 0.7421        | 0.7752        | 0.8404        | 0.9114       | 0.7726         | 0.7046          | 0.7337          | 0.123          | 0.602        | 0.694         |
| SAAT (Ours)     | <b>0.8684</b> | 0.7705        | <b>0.7983</b> | <b>0.7842</b> | <b>0.8499</b> | <b>0.918</b> | 0.7658         | 0.7084          | 0.7341          | <b>0.144</b>   | <b>0.614</b> | <b>0.702</b>  |

**Note:** *gmb-sub* represents the Area Under the Receiver Operating Characteristic (AUROC) value for subgroup metrics bias. *gmb-bspn* denotes the *gmb-auc* value for the background positive subgroup negative, while *gmb-bpsp* indicates the *gmb-auc* value for the background positive subgroup positive. *iou-f1* refers to the Intersection-Over-Union (IOU) F1 score. *auprc* represents the Area Under the Precision-Recall Curve, and *compre* signifies the comprehensiveness metric. The attention-based mechanism is utilized to accurately identify significant words in the input sentences; therefore, we do not present the explainability values for the three other models.

overlap is quantified with *lr* (Lexical Richness), *ttr* (Type Token Ratio), and *hko* (Hateful Keyword Overlap), reflecting vocabulary diversity and toxic markers (Chowdhury et al. 2019). Adversarial phrasing is assessed through *nf* (Negation Frequency), *cf* (Contrast Frequency), and *ss* (Strong Sentiment), with *ss* computed using VADER sentiment scores (Hutto and Gilbert 2014). Metrics are extracted via SpaCy’s “*en\_core\_web\_sm*” pipeline, and *hko* relies on a curated lexicon covering commonly used categories of hateful expressions. These indicators collectively capture structural, lexical, and pragmatic characteristics that may influence hateful or adversarial content.

We report the performance of each dataset on nine corpus-level characteristics in Table B.8, with anomalous values highlighted in bold. Toxigen exhibits a longer average sentence length than the other datasets, while its remaining syntactic complexity measures are comparable. In contrast, it shows pronounced deviations in lexical overlap, with substantially lower lexical richness, type-token

**Table B.7 Regular and Robust Performance Across Initialization Conditions**

| Panel A: HateXplain    |                      |                      |                      |                      |                      |                      |
|------------------------|----------------------|----------------------|----------------------|----------------------|----------------------|----------------------|
| Regular Performance    | <i>acc</i>           | <i>prec</i>          | <i>rec</i>           | <i>f1</i>            | <i>maf1</i>          | <i>auc</i>           |
| ToxDectRoBERTa         | 0.8506±0.68          | 0.8086±1.16          | 0.6526±1.46          | 0.7195±1.07          | 0.8069±0.93          | 0.9112±0.88          |
| BERT-HateXplain        | 0.8479±0.72          | 0.7789±1.04          | 0.7623±0.77          | 0.7606±0.87          | 0.8288±0.82          | 0.9086±0.79          |
| HateBERT               | 0.8466±0.76          | 0.7883±0.87          | 0.7465±1.12          | 0.7697±0.93          | 0.8356±0.86          | 0.9119±0.82          |
| fBERT                  | 0.8559±0.89          | <b>0.8106±0.75</b>   | 0.7433±0.72          | 0.7772±0.8           | <b>0.841±0.91</b>    | 0.9106±0.66          |
| SAAT(Ours)             | <b>0.8676±0.83</b>   | 0.7722±0.47          | <b>0.7855±0.98</b>   | <b>0.7785±0.52</b>   | 0.8398±0.97          | <b>0.9142±0.95</b>   |
| Robust Performance     | <i>acc*</i>          | <i>prec*</i>         | <i>rec*</i>          | <i>f1*</i>           | <i>maf1*</i>         | <i>auc*</i>          |
| ToxDectRoBERTa         | 0.5203±0.43          | 0.6116±0.53          | 0.1285±0.47          | 0.2180±0.54          | 0.4288±0.46          | 0.7444±0.46          |
| BERT-HateXplain        | 0.5101±0.67          | 0.5342±0.46          | 0.0771±0.11          | 0.1258±0.2           | 0.3422±0.49          | 0.6816±0.57          |
| HateBERT               | 0.5529±0.59          | 0.6493±0.51          | 0.2334±0.18          | 0.3365±0.43          | 0.5039±0.44          | 0.7416±0.52          |
| fBERT                  | 0.6134±0.57          | 0.6897±0.52          | 0.3636±0.25          | 0.4755±0.25          | 0.5688±0.64          | 0.8122±0.65          |
| SAAT(Ours)             | <b>0.8085±0.7</b>    | <b>0.7007±0.52</b>   | <b>0.7167±0.67</b>   | <b>0.71±0.59</b>     | <b>0.7878±0.66</b>   | <b>0.8908±0.64</b>   |
| Panel B: Latent Hatred |                      |                      |                      |                      |                      |                      |
| Regular Performance    | <i>acc</i>           | <i>prec</i>          | <i>rec</i>           | <i>f1</i>            | <i>maf1</i>          | <i>auc</i>           |
| ToxDectRoBERTa         | 0.7526 ± 0.75        | 0.6193 ± 1.12        | 0.6648 ± 0.69        | 0.6389 ± 0.72        | 0.7144 ± 0.63        | <b>0.8222 ± 0.95</b> |
| BERT-HateXplain        | 0.7224 ± 0.61        | 0.5665 ± 0.46        | 0.6672 ± 0.49        | 0.6069 ± 0.55        | 0.7066 ± 0.43        | 0.8074 ± 0.35        |
| HateBERT               | 0.7428 ± 0.53        | 0.6076 ± 0.56        | 0.6389 ± 0.74        | 0.6122 ± 0.61        | 0.7159 ± 0.59        | 0.7966 ± 0.41        |
| fBERT                  | 0.7556 ± 0.61        | 0.6122 ± 0.48        | 0.6744 ± 0.83        | 0.6126 ± 0.44        | 0.7299 ± 0.58        | 0.8144 ± 0.68        |
| SAAT(Ours)             | <b>0.7596 ± 0.62</b> | <b>0.634 ± 0.59</b>  | <b>0.6813 ± 0.72</b> | <b>0.6567 ± 0.55</b> | <b>0.7385 ± 0.37</b> | 0.8128 ± 0.54        |
| Robust Performance     | <i>acc*</i>          | <i>prec*</i>         | <i>rec*</i>          | <i>f1*</i>           | <i>maf1*</i>         | <i>auc*</i>          |
| ToxDectRoBERTa         | 0.5489 ± 0.66        | 0.3199 ± 0.38        | 0.2463 ± 0.18        | 0.2755 ± 0.23        | 0.4843 ± 0.57        | 0.6136 ± 0.67        |
| BERT-HateXplain        | 0.6075 ± 0.78        | 0.4112 ± 0.4         | 0.3865 ± 0.39        | 0.4026 ± 0.38        | 0.5545 ± 0.59        | 0.6223 ± 0.72        |
| HateBERT               | 0.4941 ± 0.78        | 0.1942 ± 0.14        | 0.1398 ± 0.17        | 0.1666 ± 0.29        | 0.4038 ± 0.49        | 0.5814 ± 0.43        |
| fBERT                  | 0.5029 ± 0.65        | 0.2862 ± 0.21        | 0.2886 ± 0.25        | 0.2865 ± 0.18        | 0.4556 ± 0.63        | 0.6011 ± 0.59        |
| SAAT(Ours)             | <b>0.6499 ± 0.38</b> | <b>0.5714 ± 0.31</b> | <b>0.6146 ± 0.44</b> | <b>0.5922 ± 0.3</b>  | <b>0.6669 ± 0.46</b> | <b>0.7747 ± 0.47</b> |
| Panel C: HSOL          |                      |                      |                      |                      |                      |                      |
| Regular Performance    | <i>acc</i>           | <i>prec</i>          | <i>rec</i>           | <i>f1</i>            | <i>maf1</i>          | <i>auc</i>           |
| ToxDectRoBERTa         | 0.9164 ± 3.82        | 0.7554 ± 4.15        | 0.7246 ± 5.31        | 0.7288 ± 4.51        | 0.7466 ± 3.83        | 0.8588 ± 3.46        |
| BERT-HateXplain        | 0.9215 ± 3.51        | 0.7277 ± 3.93        | 0.7199 ± 5.13        | 0.6915 ± 4.11        | 0.7601 ± 3.94        | 0.8597 ± 3.77        |
| HateBERT               | 0.9209 ± 3.56        | 0.7645 ± 3.82        | 0.7122 ± 4.82        | 0.742 ± 4.14         | 0.7772 ± 4.1         | 0.8623 ± 3.52        |
| fBERT                  | 0.9221 ± 3.62        | 0.7428 ± 3.8         | 0.7429 ± 5.45        | 0.7456 ± 4.28        | 0.7879 ± 4.26        | 0.8568 ± 3.72        |
| SAAT(Ours)             | <b>0.9322 ± 3.67</b> | <b>0.8036 ± 4.14</b> | <b>0.7825 ± 5.53</b> | <b>0.7746 ± 4.36</b> | <b>0.8133 ± 4.45</b> | <b>0.8767 ± 3.87</b> |
| Robust Performance     | <i>acc*</i>          | <i>prec*</i>         | <i>rec*</i>          | <i>f1*</i>           | <i>maf1*</i>         | <i>auc*</i>          |
| ToxDectRoBERTa         | 0.5949 ± 2.46        | 0.5206 ± 2.56        | 0.4986 ± 1.98        | 0.5120 ± 2.48        | 0.6277 ± 2.88        | 0.7452 ± 2.07        |
| BERT-HateXplain        | 0.5859 ± 2.14        | 0.4774 ± 1.88        | 0.5298 ± 2.06        | 0.5006 ± 2.12        | 0.5551 ± 2.04        | 0.7266 ± 1.87        |
| HateBERT               | 0.5693 ± 1.96        | 0.4726 ± 2.03        | 0.4822 ± 2.25        | 0.4888 ± 2.45        | 0.5406 ± 2.17        | 0.6972 ± 1.81        |
| fBERT                  | 0.5726 ± 1.94        | 0.4825 ± 2.11        | 0.4572 ± 2.24        | 0.4711 ± 2.29        | 0.5079 ± 1.98        | 0.7466 ± 1.79        |
| SAAT(Ours)             | <b>0.8088 ± 2.42</b> | <b>0.7644 ± 2.43</b> | <b>0.7405 ± 2.59</b> | <b>0.7835 ± 2.67</b> | <b>0.7516 ± 2.48</b> | <b>0.8325 ± 2.39</b> |
| Panel D: OLID          |                      |                      |                      |                      |                      |                      |
| Regular Performance    | <i>acc</i>           | <i>prec</i>          | <i>rec</i>           | <i>f1</i>            | <i>maf1</i>          | <i>auc</i>           |
| ToxDectRoBERTa         | <b>0.8589±2.46</b>   | 0.7944±3.36          | 0.7831±3.45          | 0.7763±4.41          | <b>0.8154±3.22</b>   | 0.8564±2.27          |
| BERT-HateXplain        | 0.8357±1.96          | 0.8026±3.49          | 0.7755±4.21          | 0.7774±3.67          | 0.8017±3.35          | 0.8246±2.85          |
| HateBERT               | 0.8454±1.93          | 0.7965±3.44          | 0.7922±4.44          | 0.7856±4.26          | 0.7966±3.75          | 0.8399±3.03          |
| fBERT                  | 0.8526±2.06          | <b>0.8046±3.54</b>   | 0.7959±3.89          | 0.8042±4.07          | 0.8123±4.15          | <b>0.8522±2.94</b>   |
| SAAT(Ours)             | 0.8244±1.89          | 0.8021±3.66          | <b>0.8136±3.47</b>   | <b>0.8147±3.57</b>   | 0.7955±3.67          | 0.8379±2.94          |
| Robust Performance     | <i>acc*</i>          | <i>prec*</i>         | <i>rec*</i>          | <i>f1*</i>           | <i>maf1*</i>         | <i>auc*</i>          |
| ToxDectRoBERTa         | 0.6072 ± 1.55        | 0.4278 ± 2.45        | 0.3745 ± 2.06        | 0.3985 ± 2.48        | 0.4266 ± 2.29        | 0.7056 ± 2.05        |
| BERT-HateXplain        | 0.6397 ± 2.21        | 0.4406 ± 2.02        | 0.3979 ± 2.48        | 0.4288 ± 2.66        | 0.4172 ± 1.87        | 0.6313 ± 2.32        |
| HateBERT               | 0.6466 ± 2.45        | 0.4179 ± 2.59        | 0.3668 ± 2.54        | 0.3828 ± 2.41        | 0.4049 ± 2.35        | 0.6897 ± 2.44        |
| fBERT                  | 0.6502 ± 2.6         | 0.4494 ± 2.75        | 0.3976 ± 2.67        | 0.3933 ± 2.78        | 0.4077 ± 2.53        | 0.6972 ± 2.08        |
| SAAT(Ours)             | <b>0.8174 ± 2.77</b> | <b>0.7555 ± 3.13</b> | <b>0.765 ± 2.9</b>   | <b>0.7476 ± 3.41</b> | <b>0.7116 ± 3.12</b> | <b>0.7288 ± 2.46</b> |

Note: Standard deviations have been scaled by 100 for easier presentation.

**Table B.8 Comparative Analysis of Corpus-Level Linguistic Features Across Hate Speech Datasets**

| Methods       | Syntactic Complexity |              |            | Lexical Overlap |              |              | Adversarial Phrasing |           |           |
|---------------|----------------------|--------------|------------|-----------------|--------------|--------------|----------------------|-----------|-----------|
|               | <i>td</i>            | <i>asl</i>   | <i>awl</i> | <i>lr</i>       | <i>hko</i>   | <i>ttr</i>   | <i>nf</i>            | <i>cf</i> | <i>ss</i> |
| HSOL          | 3.119                | 8.77         | 3.953      | 0.135           | 0.286        | 0.133        | 0.072                | 0.045     | 0.424     |
| OLID          | 3.279                | 8.83         | 3.996      | 0.116           | 0.214        | 0.147        | 0.096                | 0.046     | 0.255     |
| Latent Hatred | 3.34                 | 8.93         | 4.005      | 0.084           | 0.235        | 0.086        | 0.103                | 0.038     | 0.267     |
| Toxigen       | 3.822                | <b>11.23</b> | 3.825      | <b>0.034</b>    | <b>0.113</b> | <b>0.032</b> | <b>0.151</b>         | 0.043     | 0.254     |

ratio, and hateful keyword overlap, indicating a strong reliance on repetitive and common vocabulary. It also displays an unusually high negation frequency, suggesting that hateful intent is often expressed implicitly (Rice et al. 2020).

Table B.9 Robust Performance of Adversarial Training Methods Under White-Box Attacks at Word-level

| Panel A: HSOL          |               |               |               |               |               |               |               |                      |
|------------------------|---------------|---------------|---------------|---------------|---------------|---------------|---------------|----------------------|
| Methods                | <i>acc*</i>   | <i>prec*</i>  | <i>rec*</i>   | <i>f1*</i>    | <i>maf1*</i>  | <i>auc*</i>   | <i>asr</i> ↓  | <i>training time</i> |
| Regular                | 0.5826        | 0.514         | 0.4898        | 0.5016        | 0.5156        | 0.6135        | 0.7267        | 15min                |
| FGSM-based             | 0.5336        | 0.5251        | 0.0516        | 0.0939        | 0.2579        | 0.5846        | 0.5166        | 28min                |
| PGD-based              | 0.6245        | 0.5819        | 0.0850        | 0.1483        | 0.3479        | 0.5915        | 0.354         | 158min               |
| TRADES-based           | 0.6366        | 0.6178        | 0.0745        | 0.133         | 0.3561        | 0.6188        | 0.3513        | 161min               |
| AVmixup-based          | 0.6457        | 0.6453        | 0.1227        | 0.2062        | 0.389         | 0.6257        | 0.3505        | 158min               |
| SAAT(Ours)             | <b>0.8745</b> | <b>0.8044</b> | <b>0.7748</b> | <b>0.7893</b> | <b>0.7905</b> | <b>0.8434</b> | <b>0.1593</b> | 158min               |
| Panel B: Latent Hatred |               |               |               |               |               |               |               |                      |
| Methods                | <i>acc*</i>   | <i>prec*</i>  | <i>rec*</i>   | <i>f1*</i>    | <i>maf1*</i>  | <i>auc*</i>   | <i>asr</i> ↓  | <i>training time</i> |
| Regular                | 0.5227        | 0.3104        | 0.272         | 0.2899        | 0.4532        | 0.5813        | 0.3466        | 17min                |
| FGSM-based             | 0.4997        | 0.3683        | 0.097         | 0.1536        | 0.3122        | 0.5145        | 0.2842        | 32min                |
| PGD-based              | 0.576         | 0.4055        | 0.1332        | 0.2005        | 0.3379        | 0.5587        | 0.2673        | 162min               |
| TRADES-based           | 0.5921        | 0.419         | 0.1344        | 0.2035        | 0.341         | 0.5588        | 0.2768        | 166min               |
| AVmixup-based          | 0.5946        | 0.4237        | 0.1659        | 0.2384        | 0.3439        | 0.5623        | 0.2664        | 162min               |
| SAAT(Ours)             | <b>0.6506</b> | <b>0.5682</b> | <b>0.6147</b> | <b>0.5905</b> | <b>0.6711</b> | <b>0.7885</b> | <b>0.2121</b> | 163min               |
| Panel C: Toxigen       |               |               |               |               |               |               |               |                      |
| Methods                | <i>acc*</i>   | <i>prec*</i>  | <i>rec*</i>   | <i>f1*</i>    | <i>maf1*</i>  | <i>auc*</i>   | <i>asr</i> ↓  | <i>training time</i> |
| Regular                | 0.3898        | 0.3611        | 0.296         | 0.3253        | 0.3681        | 0.4308        | 0.4539        | 182min               |
| FGSM-based             | 0.4978        | 0.4213        | 0.356         | 0.3855        | 0.3906        | 0.5253        | 0.3846        | 415min               |
| PGD-based              | 0.5568        | 0.4677        | 0.364         | 0.426         | 0.4811        | 0.6349        | 0.3481        | 1963min              |
| TRADES-based           | 0.5702        | 0.4826        | 0.373         | 0.4233        | 0.4835        | 0.6288        | 0.3492        | 2011min              |
| AVmixup-based          | <b>0.5921</b> | 0.4867        | 0.38          | 0.4246        | <b>0.4856</b> | <b>0.6411</b> | 0.3489        | 1972min              |
| SAAT(Ours)             | 0.5766        | <b>0.4872</b> | <b>0.383</b>  | <b>0.4289</b> | 0.4838        | 0.6405        | <b>0.3467</b> | 1966min              |

Table B.10 Regular and Robust Performance of Aggregation Methods under Word-level Attacks

| Panel A: HateXplain    |                     |             |            |           |             |            |                    |              |             |            |              |             |              |
|------------------------|---------------------|-------------|------------|-----------|-------------|------------|--------------------|--------------|-------------|------------|--------------|-------------|--------------|
| Methods                | Regular Performance |             |            |           |             |            | Robust Performance |              |             |            |              |             |              |
|                        | <i>acc</i>          | <i>prec</i> | <i>rec</i> | <i>f1</i> | <i>maf1</i> | <i>auc</i> | <i>acc*</i>        | <i>prec*</i> | <i>rec*</i> | <i>f1*</i> | <i>maf1*</i> | <i>auc*</i> | <i>asr</i> ↓ |
| SAAT-0                 | 0.8226              | 0.6963      | 0.7241     | 0.7099    | 0.7729      | 0.8867     | 0.6097             | 0.6766       | 0.3941      | 0.4981     | 0.5956       | 0.8145      | 0.3872       |
| Attention              | 0.8158              | 0.699       | 0.7287     | 0.7135    | 0.7829      | 0.8659     | 0.6144             | 0.6678       | 0.4035      | 0.5031     | 0.6064       | 0.8274      | 0.3744       |
| Center Loss            | 0.832               | 0.7268      | 0.7123     | 0.7195    | 0.7895      | 0.9002     | 0.6457             | 0.6845       | 0.4472      | 0.541      | 0.6444       | 0.8456      | 0.3499       |
| SAAT                   | 0.8689              | 0.7872      | 0.7936     | 0.7904    | 0.8112      | 0.9178     | 0.8008             | 0.6824       | 0.7108      | 0.6963     | 0.7712       | 0.8824      | 0.1952       |
| Panel B: Latent Hatred |                     |             |            |           |             |            |                    |              |             |            |              |             |              |
| Methods                | <i>acc</i>          | <i>prec</i> | <i>rec</i> | <i>f1</i> | <i>maf1</i> | <i>auc</i> | <i>acc*</i>        | <i>prec*</i> | <i>rec*</i> | <i>f1*</i> | <i>maf1*</i> | <i>auc*</i> | <i>asr</i> ↓ |
| SAAT-0                 | 0.7401              | 0.5556      | 0.6247     | 0.5881    | 0.6744      | 0.7759     | 0.496              | 0.4878       | 0.1889      | 0.2723     | 0.4344       | 0.6478      | 0.3778       |
| Attention              | 0.7477              | 0.5642      | 0.6207     | 0.5911    | 0.6663      | 0.7823     | 0.5355             | 0.4896       | 0.2025      | 0.2865     | 0.4466       | 0.689       | 0.3656       |
| Center Loss            | 0.7588              | 0.5964      | 0.5855     | 0.5909    | 0.6987      | 0.8056     | 0.5668             | 0.5214       | 0.2674      | 0.3535     | 0.4514       | 0.7014      | 0.3342       |
| SAAT                   | 0.7616              | 0.6279      | 0.6888     | 0.6569    | 0.7601      | 0.8157     | 0.6478             | 0.5663       | 0.5964      | 0.581      | 0.6669       | 0.7789      | 0.2199       |
| Panel C: OLID          |                     |             |            |           |             |            |                    |              |             |            |              |             |              |
| Methods                | <i>acc</i>          | <i>prec</i> | <i>rec</i> | <i>f1</i> | <i>maf1</i> | <i>auc</i> | <i>acc*</i>        | <i>prec*</i> | <i>rec*</i> | <i>f1*</i> | <i>maf1*</i> | <i>auc*</i> | <i>asr</i> ↓ |
| SAAT-0                 | 0.7444              | 0.6225      | 0.6578     | 0.6397    | 0.6775      | 0.7678     | 0.6122             | 0.6277       | 0.4556      | 0.528      | 0.5762       | 0.6393      | 0.2998       |
| Attention              | 0.7458              | 0.6355      | 0.6598     | 0.6474    | 0.7001      | 0.7883     | 0.6364             | 0.6354       | 0.4889      | 0.5526     | 0.606        | 0.6782      | 0.2986       |
| Center Loss            | 0.7789              | 0.6823      | 0.6214     | 0.6504    | 0.7241      | 0.8049     | 0.6566             | 0.6836       | 0.4769      | 0.5618     | 0.6277       | 0.7054      | 0.2646       |
| SAAT                   | 0.8089              | 0.7966      | 0.8012     | 0.7989    | 0.7862      | 0.8221     | 0.7989             | 0.7457       | 0.7226      | 0.734      | 0.699        | 0.7225      | 0.2244       |
| Panel D: Toxigen       |                     |             |            |           |             |            |                    |              |             |            |              |             |              |
| Methods                | <i>acc</i>          | <i>prec</i> | <i>rec</i> | <i>f1</i> | <i>maf1</i> | <i>auc</i> | <i>acc*</i>        | <i>prec*</i> | <i>rec*</i> | <i>f1*</i> | <i>maf1*</i> | <i>auc*</i> | <i>asr</i> ↓ |
| SAAT-0                 | 0.7596              | 0.7885      | 0.7299     | 0.758     | 0.7404      | 0.8303     | 0.5794             | 0.4814       | 0.3619      | 0.4132     | 0.4845       | 0.6376      | 0.3571       |
| Attention              | 0.7542              | 0.7876      | 0.7221     | 0.7534    | 0.7255      | 0.8289     | 0.5833             | 0.4848       | 0.3688      | 0.4189     | 0.4904       | 0.6415      | 0.3524       |
| Center Loss            | 0.7456              | 0.7458      | 0.7186     | 0.7319    | 0.7259      | 0.8216     | 0.5676             | 0.4794       | 0.3651      | 0.4145     | 0.4878       | 0.6185      | 0.3546       |
| SAAT                   | 0.7676              | 0.7634      | 0.7119     | 0.7368    | 0.7288      | 0.8354     | 0.5827             | 0.4769       | 0.3649      | 0.4135     | 0.4768       | 0.6355      | 0.3556       |

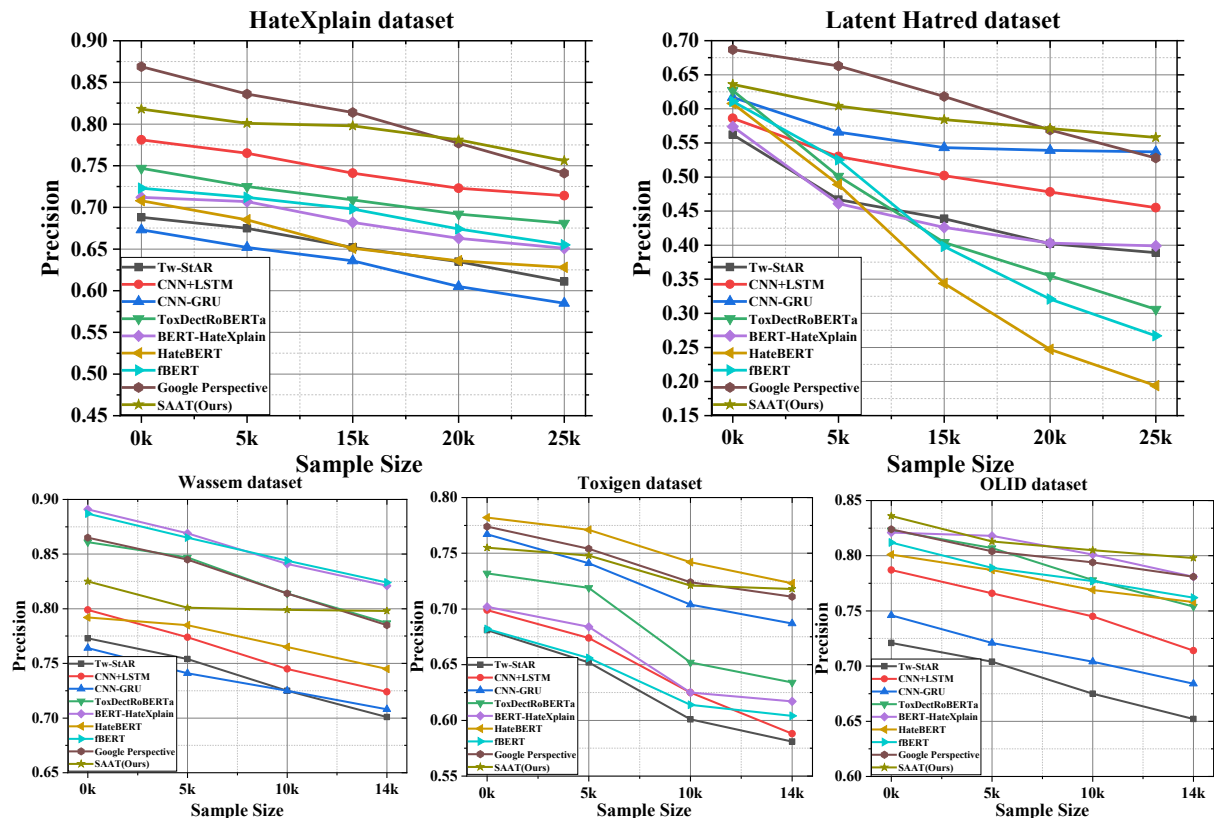

Figure B.1 Robust Performance under Black-box Attacks with Varied Sample Size

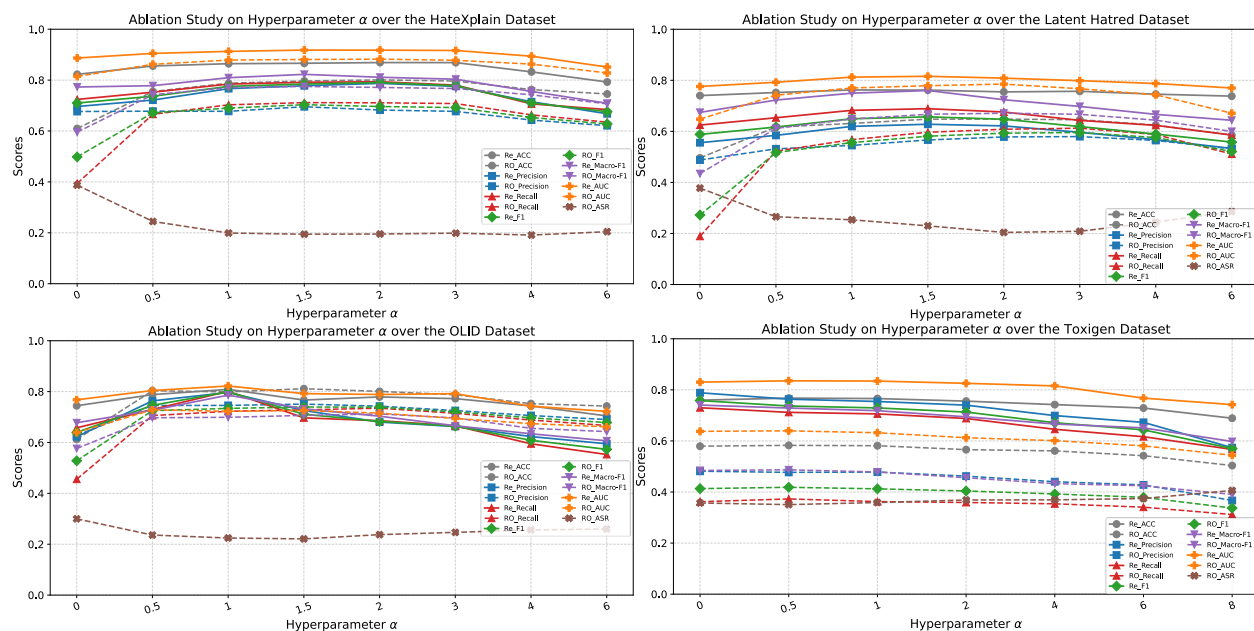

Figure B.2 Ablation Study under Varying Hyperparameters

## References

- Bartlett PL, Mendelson S (2002) Rademacher and gaussian complexities: Risk bounds and structural results. *Journal of Machine Learning Research* 3(Nov):463–482.
- Chowdhury SA, Stepanov EA, Danieli M, Riccardi G (2019) Automatic classification of speech overlaps: feature representation and algorithms. *Computer Speech & Language* 55:145–167.
- Dobriban E, Hassani H, Hong D, Robey A (2023) Provable tradeoffs in adversarially robust classification. *IEEE Transactions on Information Theory* 69(12):7793 – 7822.
- Hutto C, Gilbert E (2014) VADER: A parsimonious rule-based model for sentiment analysis of social media text. *Proceedings of the International AAAI Conference on Web and Social Media*, volume 8, 216–225 (AAAI, Palo Alto, CA).
- Pauli P, Koch A, Berberich J, Kohler P, Allgöwer F (2021) Training robust neural networks using lipschitz bounds. *IEEE Control Systems Letters* 6:121–126.
- Rice L, Wong E, Kolter Z (2020) Overfitting in adversarially robust deep learning. *Proceedings of the 37th International Conference on Machine Learning*, 8093–8104 (PMLR).
- Wang Y, Buschmeier H (2024) Revisiting the phenomenon of syntactic complexity convergence on german dialogue data. *Proceedings of the 20th Conference on Natural Language Processing*, 75–80 (ACL, Cedarville, OH).
- Xu H, Mannor S (2012) Robustness and generalization. *Machine learning* 86(3):391–423.
- Yin D, Kannan R, Bartlett P (2019) Rademacher complexity for adversarially robust generalization. *Proceedings of the 36th International conference on machine learning*, 7085–7094 (PMLR).
